# Supplementary material for: Surfactant-free tantalum oxide nanoparticles: synthesis, colloidal properties, and application as a contrast agent for computed tomography
Source: Royal Society of Chemistry journal article supplement (doi:10.1039/d0tb01204a), 2020-01-01
Supplement: d0tb01204a1.pdf [file d0tb01204a1.pdf]

Supplementary information

**Surfactant-free tantalum oxide nanoparticles: synthesis, colloid properties, and application as a contrast agent for computed tomography**

*Ekaterina Koshevaya<sup>a</sup>, Daria Nazarovskaia<sup>b</sup>, Matvey Simakov<sup>c</sup>, Alexandr Belousov<sup>d</sup>, Vladimir Morozov<sup>d</sup>, Erik Gandaliyov<sup>b</sup>, Elena Krivoshapkina<sup>b</sup>, and Pavel Krivoshapkin<sup>b\*</sup>*

*a Institute of Chemistry of Federal Research Center "Komi Science Centre of the Ural Branch of the Russian Academy of Sciences", Syktyvkar 167000, Russia*

*b ITMO University, St. Petersburg 191002, Russia E-mail: : chemicalpasha@mail.ru*

*c Veterinary Clinic Named after Ivan Fillmore, St. Petersburg 194358, Russia*

*d State Research Center – Burnasyan Federal Medical Biophysical Center of Federal Medical Biological Agency, Moscow 123182, Russia*

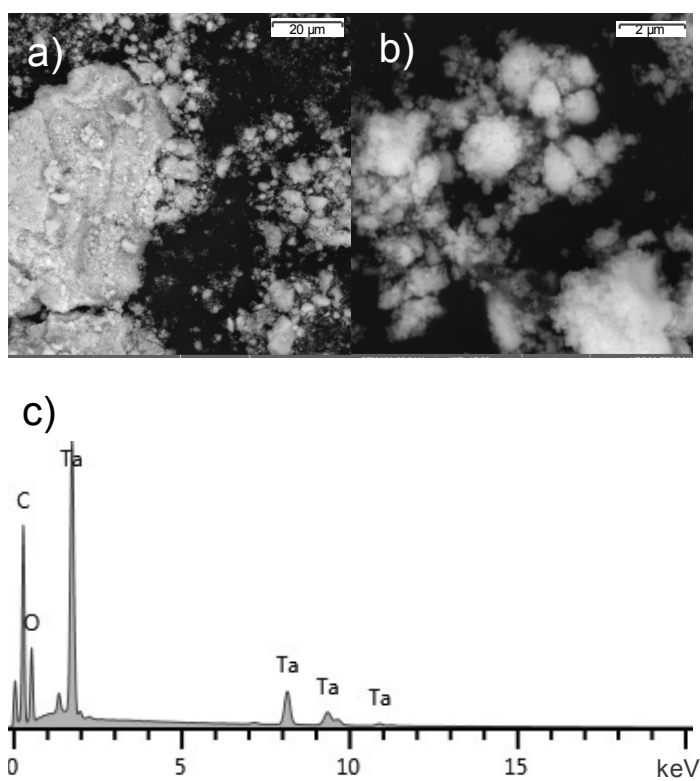

Fig. S1. SEM images (a, b) and EDX spectra (c) of tantalum oxide powder.

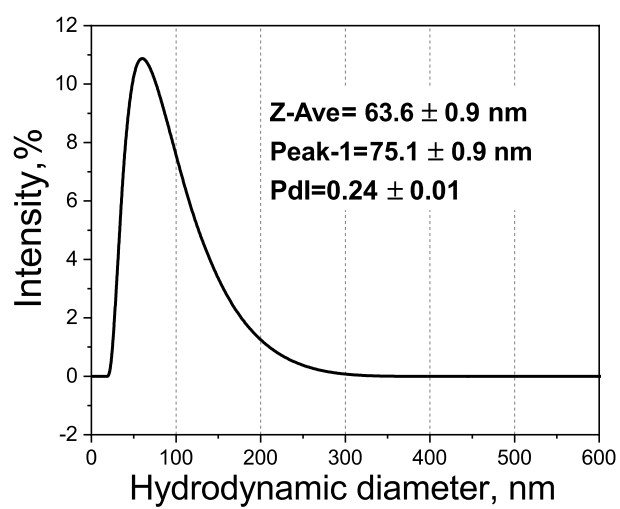

Fig. S2. Size characterization by DLS: aggregates of primary particles in water (when obtaining by pH modification).

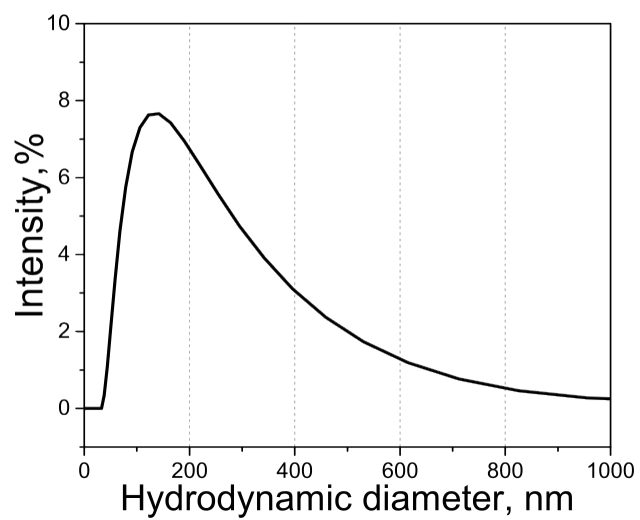

Fig. S3. Size characterization by DLS: hydrosol with the Ta<sub>2</sub>O<sub>5</sub> NPs concentration of 20 mg/ml.
